# Supplementary material for: Impact of the complementary electronic nature of C–X and M–X halogens and intramolecular X⋯O interaction on supramolecular assemblies of Zn(ii) complexes of o-halophenyl substituted hydrazides
Source: Royal Society of Chemistry journal article supplement (doi:10.1039/c7ce00060j), 2017-01-01
Supplement: c7ce00060j1.pdf [file c7ce00060j1.pdf]

**Impact of Complementary Electronic Nature of C–X and M–X Halogens and  
Intramolecular X··O Interaction in Supramolecular Assemblies of Zn(II) Complexes of  
O-Halophenyl Substituted Hydrazides**

*Arkalekha Mandal,<sup>a</sup> Bhisma K Patel,<sup>a\*</sup> Rahul Shukla,<sup>b</sup> Deepak Chopra<sup>b\*</sup>*

*<sup>a</sup> Department of Chemistry, Indian Institute of Technology Guwahati,  
North Guwahati, Guwahati-781039, Assam, India*

*<sup>b</sup> Department of Chemistry, IISER Bhopal, Bhopal, India*

*E-mail: [patel@iitg.ernet.in](mailto:patel@iitg.ernet.in); [dchopra@iiserb.ac.in](mailto:dchopra@iiserb.ac.in)*

**Contents:**

|                                                                                        |              |
|----------------------------------------------------------------------------------------|--------------|
| 1. Materials and methods                                                               | Page S1-S2   |
| 2. Syntheses procedure and characterization data for compounds                         | Page S2-S4   |
| 3. Relevant bond lengths and bond angles of <b>1-3</b>                                 | Page S4-S5   |
| 4. Hydrogen bonding interactions of <b>hyd-Cl</b> , <b>hyd-Br</b> and <b>1-3</b>       | Page S6      |
| 5. NBO charge on halogen atom in ligands and complexes                                 | Page S6-S7   |
| 6. NBO charge on halogen atom in ligands and complexes                                 | Page S7      |
| 7. Optimized gas phase geometry of ligands and complexes                               | Page S8-S18  |
| 8. Optimized gas phase structures of ligands and complexes                             | Page S17-S18 |
| 9. <sup>1</sup> H, <sup>13</sup> C NMR of <b>trz-F</b> , <b>hyd-Cl</b> , <b>hyd-Br</b> | Page S19-S20 |
| 10. ESI MS of ligands and complexes <b>1-3</b>                                         | Page S21-S27 |

**Materials:** 2-Fluorobenzhydrazide, 2-chlorobenzhydrazide, 2-bromobenzhydrazide (Alfa Aeser), 2-cyanopyridine (Aldrich, USA), anhydrous ZnCl<sub>2</sub> (Merck India) and solvents were used as received without further purification. Single crystals of complexes **1-3** and ligands **hyd-Cl** and **hyd-Br** were grown by slow evaporation from common organic solvents

(methanol and DMF) at room temperature. X-ray crystallographic data were collected using a Bruker SMART APEX-CCD diffractometer and Agilent Supernova diffractometer with Mo-K $\alpha$  radiation ( $\lambda = 0.71073$  Å). The intensity data were corrected by Lorentz and polarization effects and empirical absorption corrections were made using multi-scan method. All structures were solved by direct methods using SHELX-97. Non hydrogen atoms were refined anisotropically by full matrix least-squares on  $F^2$ , using SHEXL-97 and further refined using PLATON. All hydrogen atoms were included in the calculated positions and refined isotropically using a riding model. Useful parameters for hydrogen bond and other non-covalent interactions were calculated using PARST program implemented in PLATON.

### Syntheses procedure and characterization data

*2-[5-(2-Fluoro-phenyl)-1H-[1,2,4]triazol-3-yl]-pyridine* (**trz-F**): 2-Fluorobenzhydrazide (0.925 g, 6 mmol) and 2-cyanopyridine (0.677 g, 6.5 mmol) were taken together in 1.5 mL of PEG-400 in a 25 mL round bottom flask and heated at 100 °C for 12 h. The resulting gummy yellow liquid was then added to a beaker containing 50 mL of water and stirred for 1 hour from which a pale yellow solid precipitate out. It was filtered, dried and subjected to column chromatography on a basic alumina column by eluting it with EtOAc:hexane (2:1) to obtain pure **trz-F** as a white solid. Yield 1.155 g, 80%; IR (KBr,  $\text{cm}^{-1}$ ): 3564, 3344, 3135, 1691, 1641, 1615, 1590, 1543, 1495, 1384, 1334, 1286, 1232, 1102, 1026, 985, 823, 790, 759;  $^1\text{H}$  NMR (DMSO- $d_6$ , 600 MHz)  $\delta$  8.59 (d,  $J = 4.5$  Hz, 1H), 8.12 (d,  $J = 7.9$  Hz, 1H), 8.04 (dd,  $J = 10.6, 4.5$  Hz, 1H), 7.87 (td,  $J = 7.8, 1.6$  Hz, 1H), 7.47-7.41 (m, 1H), 7.40-7.36 (m, 1H), 7.26 (dd,  $J = 11.0, 4.1$  Hz, 1H), 7.21 (dd,  $J = 10.5, 8.8$  Hz, 1H);  $^{13}\text{C}$  NMR (DMSO- $d_6$ , 150 MHz)  $\delta$  161.11, 159.45, 149.53, 148.17, 137.58, 131.82, 131.77, 130.19, 124.67, 121.74, 116.23, 116.08; ESI MS calcd for  $\text{C}_{13}\text{H}_{10}\text{N}_4\text{F}^+$  (M+H) $^+$  241.089, found 241.088.

*2-Chlorobenzoic acid(amino-pyridin-2-yl-methylene)hydrazide (hyd-Cl)*: Ligand **hyd-Cl** was synthesized by heating 2-chlorobenzhydrazide (0.925 g, 6 mmol) with 2-cyanopyridine (0.677 g, 6.5 mmol) in 1.2 g of PEG 400 under an identical reaction conditions as described for **trz-F**. The crude product so obtained was purified over a column of basic alumina by eluting it with EtOAc:hexane (1:1) to give product as a white solid. Yield 1.233 g, 75%; IR (KBr,  $\text{cm}^{-1}$ ): 3416, 3201, 1667, 1639, 1603, 1591, 1580, 1545, 1505, 1467, 1443, 1422, 1399, 1366, 1309 (s), 1262, 1250, 1171, 1148, 1128, 1054, 1036, 1012, 910, 797, 776, 747, 738;  $^1\text{H}$  NMR (DMSO- $d_6$ , 600 MHz)  $\delta$  8.72 (s, 1H), 8.13 (d,  $J = 7.7$  Hz, 1H), 8.01 (s, 1H), 7.92 (s, 1H), 7.64-7.40 (m, 5H);  $^{13}\text{C}$  NMR (DMSO- $d_6$ , 100 MHz)  $\delta$  160.92, 154.79, 150.30, 146.75, 138.55, 137.72, 132.31, 132.06, 131.13, 127.87, 125.86, 122.14; ESI MS calcd for  $\text{C}_{13}\text{H}_{12}\text{N}_4^{35}\text{Cl}^+$  (M+H) $^+$  275.070 found 275.063.

*2-Bromobenzoic acid(amino-pyridin-2-yl-methylene)hydrazide (hyd-Br)*: Solid **hyd-Br** was obtained by heating a mixture of 2-bromobenzhydrazide (1.290 g, 6 mmol) and 2-cyanopyridine (0.677 g, 6.5 mmol) in PEG 400 under an identical reaction conditions as described for **trz-F**. The crude product so obtained was purified over a column of basic alumina by eluting it with EtOAc:hexane (2:3) to give product as a white solid. Yield 1.145 g, 60%; IR (KBr,  $\text{cm}^{-1}$ ): 3443 (s), 3318 (m), 3191 (m), 3043 (m), 3008 (m), 2925 (w), 2852 (w), 1670 (s), 1642 (s), 1588 (m), 1550 (s), 1473 (s), 1440 (m), 1397 (s), 1313 (s), 1269 (m), 1168 (s), 1089 (w), 1050 (s), 1030 (s), 996 (m), 971 (w), 952 (m), 904 (s), 866 (w), 795 (s), 777 (m), 742 (s);  $^1\text{H}$  NMR (DMSO  $d_6$ , 400 MHz)  $\delta$  8.71 (d,  $J = 3.8$  Hz, 1H), 8.12 (d,  $J = 7.6$  Hz, 1H), 7.99 (t,  $J = 7.9$  Hz, 1H), 7.89 (s, 1H), 7.62- 7.40 (m, 5H);  $^{13}\text{C}$  NMR (DMSO- $d_6$ , 100 MHz):  $\delta$  160.73, 158.22, 149.62, 147.15, 137.74, 131.08, 131.00, 129.98, 124.81, 124.64, 121.43, 116.67, 116.46; ESI MS calcd for  $\text{C}_{13}\text{H}_{11}\text{N}_4^{79}\text{Br}^+$  (M+H) $^+$  319.019, found 318.990.

*Synthesis of [Zn(hyd-F)Cl<sub>2</sub>] (1):* To a solution of ligand **trz-F** (48 mg, 0.20 mmol) in DMF (2.5 mL), solid anhydrous ZnCl<sub>2</sub> (34 mg, 0.25 mmol) was added and stirred for five hours. The golden yellow coloured clear solution so obtained was left undisturbed in a 5 mL conical flask for crystallization from which prismatic colourless crystals of **1** was obtained after two weeks. Isolated yield: 55 mg, 70%. Anal. Calcd. for C<sub>13</sub>H<sub>11</sub>N<sub>4</sub>OFC<sub>2</sub>Zn: C, 39.57%; H, 2.81%; N, 14.20%. Found: C, 39.85%; H, 2.85%; N, 14.05%. IR (KBr, cm<sup>-1</sup>): 3195 (b), 3115 (m), 1622 (s), 1588 (w), 1562 (s), 1497 (s), 1453 (s), 1387 (s), 1282 (s), 1263 (w), 1229 (s), 1181 (s), 1151 (s), 1127 (w), 1094 (s), 1046 (s), 1025 (s), 1006 (m), 985 (s), 945 (w), 865 (w), 824 (s), 792 (s), 771 (s), 746 (s), 716 (m), 695 (w), 664 (w), 644 (m), 496 (m); UV-Vis [ $\lambda_{\text{max}}$  (nm), ( $\epsilon$ , M<sup>-1</sup>cm<sup>-1</sup>), DMSO solution]: 270 (21490), 314 (38515), 327 (29850). ESI MS  $m/z$  calcd [<sup>64</sup>Zn(**hyd-F**)(<sup>35</sup>Cl)]<sup>+</sup> 356.99, found 357.65.

*Synthesis of [Zn(hyd-Cl)Cl<sub>2</sub>].DMF (2):* To a stirred solution of ligand **hyd-Cl** (69 mg, 0.25 mmol) in DMF (2.5 mL) was added anhydrous ZnCl<sub>2</sub> (41 mg, 0.30 mmol). The light yellow colored solution so obtained was left undisturbed in a 5 mL conical flask. A white prismatic crystal deposited after two weeks were collected and washed with cold methanol (2 x 1 mL). Yield 89 mg, 74%. Anal. Calcd. for C<sub>16</sub>H<sub>18</sub>N<sub>5</sub>O<sub>2</sub>Cl<sub>3</sub>Zn: C, 39.70%; H, 3.75%; N, 14.47%. Found: C, 39.81%; H, 3.68%; N, 14.55%. IR (KBr, cm<sup>-1</sup>): 3627 (m), 3419 (b), 1703 (s), 1655 (w), 1613 (s), 1556 (s), 1476 (s), 1385 (s), 1320 (s), 1282 (s), 1182 (s), 1155 (s), 1130 (w), 1113 (w), 1091 (m), 1067 (s), 1049 (m), 1031 (m), 1002 (m), 984 (m), 876 (w), 845 (s), 802 (s), 775 (s), 757 (m), 737 (m), 712 (s), 655 (m), 637 (m), 570 (m), 452 (s). UV-Vis [ $\lambda_{\text{max}}$  (nm), ( $\epsilon$ , M<sup>-1</sup>cm<sup>-1</sup>), DMSO] 269 (7800), 313 (15840), 377 (2520). ESI MS  $m/z$  calcd [**hyd**-<sup>35</sup>Cl+H]<sup>+</sup> 275.07, found 275.14; calcd [<sup>64</sup>Zn(**hyd**-<sup>35</sup>Cl)<sup>35</sup>Cl]<sup>+</sup> 372.96, found 373.05.

*Synthesis of [Zn(hyd-Br)Cl<sub>2</sub>].DMF (3):* The procedure adopted for the synthesis of complex **2**, was applied for the synthesis of complex (**3**). Yield 84 mg, 64%. Anal. Calc. for

$C_{16}H_{18}N_5O_2Cl_2BrZn$ : C, 36.36%; H, 3.43%; N, 13.25%. Found: C, 36.43%; H, 3.32%; N, 13.19%. IR (KBr,  $cm^{-1}$ ): 3653 (s), 3473 (b), 3182 (b), 3049 (w), 1704 (s), 1656 (m), 1616 (m), 1533 (s), 1486 (m), 1473(m), 1445(m), 1426(s), 1318(s), 1275(s), 1198(m), 1173 (m), 1157 (w), 1141 (w), 1121 (m), 1094 (s), 1044 (m), 1030 (m), 1017 (s), 970 (w), 915 (m), 897 (w), 825 (w), 793 (s), 763 (w), 750 (m), 724 (m), 687 (s), 641 (m), 570 (m); UV-Vis [ $\lambda_{max}(nm)$ , ( $\epsilon$ ,  $M^{-1}cm^{-1}$ ), DMSO]: 265 (9750), 312 (26180), 329 (19870); ESI MS  $m/z$  calcd [ $^{64}Zn(^{79}hyd-Br)(^{35}Cl)^+$ ] 416.91, found 416.99.

**Table S1.** Relevant bond lengths (Å) and bond angles ( $^{\circ}$ ) in metal complex **1**

|            |           |             |           |
|------------|-----------|-------------|-----------|
| Zn1–O1     | 2.212(2)  | N1–Zn1–N2   | 74.43(6)  |
| Zn1–N1     | 2.159(2)  | N2–Zn1–O1   | 72.97(6)  |
| Zn1–N2     | 2.079(2)  | N1–Zn1–O1   | 147.40(6) |
| Zn1–Cl1    | 2.250(6)  | O1–Zn1–Cl1  | 97.86(4)  |
| Zn1–Cl2    | 2.258(6)  | O1–Zn1–Cl2  | 100.64(4) |
|            |           | N1–Zn1–Cl1  | 99.29(5)  |
| N1–Zn1–Cl2 | 97.27(5)  | N2–Zn1–Cl2  | 122.69(5) |
| N2–Zn1–Cl1 | 123.08(5) | Cl1–Zn1–Cl2 | 114.23(2) |

**Table S2.** Relevant bond lengths (Å) and bond angles ( $^{\circ}$ ) in metal complexes **2** and **3**

| Complex <b>2</b> |           | Complex <b>3</b> |          |
|------------------|-----------|------------------|----------|
| Zn1–N1           | 2.222(3)  | Zn1–N1           | 2.189(4) |
| Zn1–N2           | 2.070(3)  | Zn1–N2           | 2.079(3) |
| Zn1–O1           | 2.250(3)  | Zn1–O1           | 2.241(4) |
| Zn1–Cl2          | 2.231(9)  | Zn1–Cl1          | 2.249(1) |
| Zn1–Cl3          | 2.262(9)  | Zn1–Cl2          | 2.218(1) |
| Zn2–N5           | 2.198(3)  | Zn2–N5           | 2.225(3) |
| Zn2–N6           | 2.078 (2) | Zn2–N6           | 2.086(4) |
| Zn2–O2           | 2.250(3)  | Zn2–O2           | 2.256(4) |
| Zn2–Cl5          | 2.228(9)  | Zn2–Cl3          | 2.260(1) |
| Zn2–Cl6          | 2.249(9)  | Zn2–Cl4          | 2.221(1) |
| N1–Zn1–N2        | 73.71(9)  | N1–Zn1–N2        | 73.5(1)  |
| N1–Zn1–O1        | 147.25(9) | N1–Zn1–O1        | 145.5(1) |
| N2–Zn1–O1        | 73.60(9)  | N2–Zn1–O1        | 73.1(1)  |
| N1–Zn1–Cl2       | 98.78(7)  | N1–Zn1–Cl1       | 99.9(1)  |

|             |           |             |           |
|-------------|-----------|-------------|-----------|
| N1–Zn1–Cl3  | 99.40(7)  | N1–Zn1–Cl2  | 100.1(1)  |
| N2–Zn1–Cl2  | 125.33(7) | N2–Zn1–Cl1  | 132.4(1)  |
| N2–Zn1–Cl3  | 116.31(7) | O1–Zn1–Cl1  | 96.1(1)   |
| O1–Zn1–Cl2  | 98.42(6)  | O1–Zn1–Cl2  | 98.6(1)   |
| O1–Zn1–Cl3  | 96.62(6)  | N2–Zn1–Cl1  | 132.4(1)  |
| Cl2–Zn1–Cl3 | 118.33(4) | N2–Zn1–Cl2  | 108.9(1)  |
| N5–Zn2–N6   | 73.8(1)   | N5–Zn2–N6   | 73.7(1)   |
| N5–Zn2–O2   | 146.1(1)  | N5–Zn2–O2   | 146.8(1)  |
| N6–Zn2–O2   | 73.29(9)  | N6–Zn2–O2   | 73.3(1)   |
| Cl5–Zn2–Cl6 | 118.84(4) | Cl3–Zn2–Cl4 | 118.03(5) |
| N5–Zn2–Cl5  | 100.08(8) | N5–Zn2–Cl3  | 100.09(9) |
| N6–Zn2–Cl5  | 108.83(7) | N6–Zn2–Cl3  | 115.2(1)  |
| N5–Zn2–Cl6  | 99.27(7)  | N5–Zn2–Cl4  | 98.47(9)  |
| N6–Zn2–Cl6  | 132.26(7) | N6–Zn2–Cl4  | 126.7(1)  |
| O2–Zn2–Cl5  | 98.03(7)  | O2–Zn2–Cl3  | 96.66(9)  |
| O2–Zn2–Cl6  | 96.68(7)  | O2–Zn2–Cl4  | 98.58(9)  |

**Table S3.** Hydrogen bonding interactions in ligand **hyd-Cl** and **hyd-Br**

| Compound      | D–H···A     | D···A (Å) | H···A (Å) | D–H···A(°) | Symmetry         |
|---------------|-------------|-----------|-----------|------------|------------------|
| <b>hyd-Cl</b> | N4–H4A···O1 | 2.886(3)  | 2.01      | 178        | -x+1/2, y+1/2, z |
|               | N3–H3···O1  | 2.932(3)  | 2.11      | 160        | -x+1/2, y+1/2, z |
|               | C9–H9···N2  | 3.414(4)  | 2.61      | 145        | -x+1/2, y+1/2, z |
| <b>hyd-Br</b> | N4–H4A···O1 | 2.887(1)  | 2.03      | 180        | -x+1/2, y+1/2, z |
|               | N3–H3···O1  | 2.968(1)  | 2.14      | 161        | -x+1/2, y+1/2, z |
|               | C9–H9···N2  | 3.376(1)  | 2.86      | 143        | -x+1/2, y+1/2, z |

**Table S4.** Hydrogen bonding interactions in metal complexes **2** and **3**

| Compound | D–H···A     | D···A (Å) | H···A (Å) | D–H···A(°) | Symmetry       |
|----------|-------------|-----------|-----------|------------|----------------|
| <b>2</b> | N4–H4A···O3 | 2.793(4)  | 1.94      | 170        | x,-y+1/2,z+1/2 |
|          | N3–H3A···O3 | 2.737(4)  | 1.88      | 171        | x,-y+1/2,z+1/2 |
|          | N7–H7A···O4 | 2.776(3)  | 1.92      | 171        | x,y-1,z        |
|          | N8–H8A···O4 | 2.881(5)  | 2.04      | 167        | x,y-1,z        |
|          | N3–H3···O3  | 2.781(2)  | 1.93      | 169        | x,y,z          |

|          |             |          |      |     |                  |
|----------|-------------|----------|------|-----|------------------|
| <b>3</b> | N4-H4A...O3 | 2.868(4) | 2.02 | 167 | x,y,z            |
|          | N7-H7A...O4 | 2.729(2) | 1.87 | 173 | x,-y+1/2+1,z+1/2 |
|          | N8-H8A...O4 | 2.794(3) | 1.94 | 172 | x,-y+1/2+1,z+1/2 |

**Table S5.** NBO charge on halogen atoms calculated at dispersion corrected B3LYP/6-31G(d,p) level of theory

| Molecule                                           | Halogen atom | NBO charge |
|----------------------------------------------------|--------------|------------|
| <b>hyd-Cl</b>                                      | Cl           | 0.0264     |
| % of <i>s</i> character in C hybrid orbital of C-X |              | 22.59      |
| <b>hyd-Br</b>                                      | Br           | 0.0910     |
| % of <i>s</i> character in C hybrid orbital of C-X |              | 22.25      |
| <b>1</b>                                           | F            | -0.3515    |
| % of <i>s</i> character in C hybrid orbital of C-X |              | 21.01      |
| <b>2-closed</b>                                    | Cl           | 0.0602     |
| % of <i>s</i> character in C hybrid orbital of C-X |              | 23.15      |
| <b>2-open</b>                                      | Cl           | 0.0049     |
| % of <i>s</i> character in C hybrid orbital of C-X |              | 22.26      |
| <b>3-closed</b>                                    | Br           | 0.1454     |
| % of <i>s</i> character in C hybrid orbital of C-X |              | 22.79      |
| <b>3-open</b>                                      | Br           | 0.0667     |
| % of <i>s</i> character in C hybrid orbital of C-X |              | 21.22      |

**Table S6.** Energy of ‘closed’ and ‘open’ molecules in complex **2** and **3** determined at M06-2X/6-31G(d,p) and B3LYP-D3/6-31G(d,p) level

---

|                                                                                       |
|---------------------------------------------------------------------------------------|
| E (‘closed’ molecule of complex <b>2</b> , at M06-2X/6-31G(d,p)) = -3955.38534 a.u.   |
| E (‘closed’ molecule of complex <b>2</b> , at B3LYP-D3/6-31G(d,p)) = -3955.88634 a.u. |
| E (‘open’ molecule of complex <b>2</b> , at M06-2X/6-31G(d,p)) = -3955.38843 a.u.     |
| E (‘open’ molecule of complex <b>2</b> , at B3LYP-D3/6-31G(d,p)) = -3955.89017 a.u.   |
| E (‘closed’ molecule of complex <b>3</b> , at M06-2X/6-31G(d,p)) = -6067.00176 a.u.   |
| E (‘closed’ molecule of complex <b>3</b> , at B3LYP-D3/6-31G(d,p)) = -6067.00278 a.u. |
| E (‘open’ molecule of complex <b>3</b> , at M06-2X/6-31G(d,p)) = -6067.00278 a.u.     |
| E (‘open’ molecule of complex <b>3</b> , at B3LYP-D3/6-31G(d,p)) = -6067.40137 a.u.   |

---

**Table S7A.** Coordinates of optimized geometry of ligand **hyd-Cl** determined at M06-2X/6-31G(d,p) level

---

|    |             |             |             |
|----|-------------|-------------|-------------|
| Cl | -3.58051200 | 2.00457300  | 0.90220700  |
| O  | -1.11583400 | 1.64172900  | -0.97489600 |
| N  | -0.17680800 | -0.19165500 | 0.01707100  |
| H  | -0.34268600 | -1.14071500 | 0.33803500  |
| N  | 1.11262200  | 0.18661200  | -0.25492400 |
| N  | 4.32280200  | -0.78708700 | 0.89822200  |
| N  | 1.74167800  | -1.39183800 | 1.39356700  |
| H  | 0.98689600  | -1.14626200 | 2.02328500  |
| H  | 2.58919900  | -1.67689700 | 1.87221900  |
| C  | -1.22706500 | 0.54008400  | -0.49184400 |
| C  | 2.00373900  | -0.43712900 | 0.42768600  |
| C  | -3.67113800 | 0.41634000  | 0.19964100  |
| C  | -2.54419500 | -0.18512300 | -0.36733500 |
| C  | 3.43359800  | -0.15853200 | 0.12477300  |
| C  | 6.07777800  | 0.28965100  | -0.32964500 |
| H  | 7.14200000  | 0.43722400  | -0.47329600 |
| C  | -2.67083300 | -1.47643200 | -0.88723500 |
| H  | -1.80544600 | -1.94080000 | -1.35201400 |
| C  | 5.61760300  | -0.56379000 | 0.66646500  |
| H  | 6.31662900  | -1.09152600 | 1.31014500  |
| C  | 3.79058400  | 0.71318600  | -0.90697200 |
| H  | 3.01174800  | 1.18423800  | -1.49450600 |
| C  | 5.14003800  | 0.94108400  | -1.12874600 |

---



|   |             |             |             |
|---|-------------|-------------|-------------|
| H | 5.45946100  | 1.61591200  | -1.91623200 |
| C | -4.99445000 | -1.53764300 | -0.27785500 |
| H | -5.94820900 | -2.05322700 | -0.24007000 |
| C | -4.88835800 | -0.25551200 | 0.25123200  |
| H | -5.74214200 | 0.23255400  | 0.70738200  |
| C | -3.88544300 | -2.15210000 | -0.85030100 |
| H | -3.96529800 | -3.14880200 | -1.27003600 |

**Table S7B.** Coordinates of optimized geometry of ligand **hyd-Cl** determined at B3LYP-D3/6-31G(d,p) level

|    |             |             |             |
|----|-------------|-------------|-------------|
| Cl | 0.51830900  | -0.11230500 | -0.11675800 |
| O  | -0.26379900 | 0.17805800  | 2.97201900  |
| N  | 1.89264800  | 0.13522800  | 3.76564900  |
| H  | 2.81586600  | 0.55150800  | 3.67826000  |
| N  | 1.58927800  | -0.56772500 | 4.90633800  |
| N  | 3.42252200  | -2.38147200 | 7.35987000  |
| N  | 3.91832000  | -1.04167600 | 5.07809400  |
| H  | 4.04587900  | -1.20792700 | 4.08640300  |
| H  | 4.52030200  | -1.61485300 | 5.66215700  |
| C  | 0.88883700  | 0.55988400  | 2.91654000  |
| C  | 2.60136000  | -1.10031500 | 5.50989400  |
| C  | 1.21340000  | 1.37026700  | 0.51593200  |
| C  | 1.38706800  | 1.55605000  | 1.89530200  |
| C  | 2.35243700  | -1.78997200 | 6.80273100  |
| C  | 2.02250900  | -3.11132000 | 9.17318500  |
| H  | 1.93834500  | -3.64725100 | 10.11276300 |
| C  | 1.98577600  | 2.74714600  | 2.33200600  |
| H  | 2.10817400  | 2.90855200  | 3.39936700  |
| C  | 3.25147200  | -3.02254800 | 8.52155800  |
| H  | 4.13851300  | -3.48730500 | 8.94656200  |
| C  | 1.07674400  | -1.81499500 | 7.38411900  |
| H  | 0.25615300  | -1.31362800 | 6.88536000  |
| C  | 0.91481200  | -2.49408100 | 8.58564300  |
| H  | -0.06036800 | -2.54007100 | 9.06096200  |
| C  | 2.20982200  | 3.52199800  | 0.06200400  |
| H  | 2.52216900  | 4.27628600  | -0.65362800 |
| C  | 1.62538500  | 2.34159900  | -0.39664500 |
| H  | 1.48816900  | 2.16537900  | -1.45761900 |
| C  | 2.39182500  | 3.72808200  | 1.42914000  |
| H  | 2.84248700  | 4.64651000  | 1.79152600  |

**Table S8A.** Coordinates of optimized geometry of ligand **hyd-Br** determined at B3LYP-D3/6-31G(d,p) level

|    |             |             |             |
|----|-------------|-------------|-------------|
| Br | 3.28138900  | -1.80008100 | -0.42195900 |
| O  | 0.78164100  | -1.00651900 | 1.48437500  |
| N  | -0.24508300 | 0.45512000  | 0.03914900  |
| H  | -0.11485400 | 1.28775400  | -0.52921000 |
| N  | -1.52367900 | 0.06553300  | 0.35747400  |
| N  | -2.20512100 | 1.10799300  | -1.67368300 |
| H  | -1.41253000 | 0.77507400  | -2.21060600 |
| H  | -3.05713600 | 1.18781800  | -2.22107000 |
| C  | 3.27586400  | 0.06470700  | -0.00826200 |
| C  | -2.43289200 | 0.42011700  | -0.49110100 |
| C  | 0.83595900  | -0.05308300 | 0.73178500  |
| C  | 2.11131400  | 0.70242600  | 0.44046800  |
| N  | -4.75057500 | 0.44855400  | -1.09590900 |
| C  | -6.03994700 | 0.19346900  | -0.84626100 |
| H  | -6.74327700 | 0.47580200  | -1.62669400 |
| C  | -3.84906800 | 0.11850100  | -0.15583100 |
| C  | -4.20077300 | -0.47475400 | 1.06497300  |
| H  | -3.42509800 | -0.71201100 | 1.78297800  |
| C  | 2.16518900  | 2.08212900  | 0.68798700  |
| H  | 1.27318200  | 2.58305300  | 1.05374400  |
| C  | -6.48841300 | -0.40072500 | 0.33214500  |
| H  | -7.54633000 | -0.58862500 | 0.48254700  |
| C  | 4.45637100  | 0.78007000  | -0.20508400 |
| H  | 5.33965600  | 0.26365600  | -0.56322000 |
| C  | 4.48921200  | 2.15013000  | 0.05583300  |
| H  | 5.41332200  | 2.70013200  | -0.09348900 |
| C  | 3.34238200  | 2.80519800  | 0.50341100  |
| H  | 3.36366500  | 3.87015600  | 0.71184100  |
| C  | -5.54344900 | -0.74179300 | 1.30363600  |
| H  | -5.85164700 | -1.20658000 | 2.23531300  |

**Table S8B.** Coordinates of optimized geometry of ligand **hyd-Br** determined at M06-2X/6-31G(d,p) level

|    |             |             |             |
|----|-------------|-------------|-------------|
| Br | 3.30603600  | -1.76887900 | -0.44511100 |
| O  | 0.77717000  | -1.10659500 | 1.33745400  |
| N  | -0.25660700 | 0.45156200  | 0.02295500  |
| H  | -0.14774900 | 1.33871000  | -0.45900000 |

---

|   |             |             |             |
|---|-------------|-------------|-------------|
| N | -1.52392700 | 0.03069300  | 0.33385900  |
| N | -2.21116000 | 1.23854200  | -1.58296400 |
| H | -1.41946300 | 0.94550600  | -2.14312100 |
| H | -3.06074200 | 1.36730700  | -2.12172500 |
| C | 3.27185600  | 0.06659800  | -0.00337000 |
| C | -2.43472400 | 0.45325400  | -0.46678200 |
| C | 0.82607300  | -0.10110900 | 0.66897800  |
| C | 2.09585400  | 0.67936600  | 0.43476400  |
| N | -4.75613000 | 0.53262300  | -1.03828000 |
| C | -6.03810400 | 0.25313400  | -0.79638400 |
| H | -6.75191300 | 0.60191300  | -1.53821600 |
| C | -3.84981300 | 0.12257700  | -0.14704100 |
| C | -4.17637200 | -0.57767200 | 1.01699000  |
| H | -3.38526000 | -0.87459000 | 1.69497100  |
| C | 2.12457200  | 2.04783800  | 0.71811300  |
| H | 1.22019700  | 2.52725600  | 1.08267000  |
| C | -6.46766000 | -0.44396400 | 0.32692700  |
| H | -7.52234200 | -0.64705500 | 0.47306400  |
| C | 4.44330400  | 0.79958700  | -0.16033800 |
| H | 5.33811400  | 0.29965900  | -0.51270300 |
| C | 4.45294500  | 2.15963400  | 0.13305500  |
| H | 5.37162600  | 2.72452500  | 0.01483700  |
| C | 3.29309700  | 2.78787600  | 0.57475100  |
| H | 3.29785500  | 3.84621200  | 0.81137700  |
| C | -5.51213400 | -0.86785900 | 1.24872000  |
| H | -5.80752800 | -1.41541400 | 2.13783500  |

---

**Table S9A.** Coordinates of optimized geometry of complex **1** determined at M06-2X/6-31G(d,p) level

---

|    |             |             |             |
|----|-------------|-------------|-------------|
| Zn | -0.95867000 | -1.17023200 | 0.17833400  |
| Cl | -0.92331200 | -0.52241900 | 2.36729800  |
| Cl | -1.65468300 | -3.01923100 | -0.85182500 |
| C  | -2.57468300 | 1.34621300  | -0.23476900 |
| C  | 1.75256100  | -0.10171200 | -0.20272100 |
| C  | -3.59768800 | 2.27601200  | -0.34640600 |
| H  | -3.38850800 | 3.34000500  | -0.31495100 |
| C  | -5.10440900 | 0.42487200  | -0.61475800 |
| H  | -6.09700200 | 0.01771000  | -0.76566700 |
| C  | 3.23862100  | -0.02415300 | -0.19672000 |
| C  | 3.99183100  | 1.14118400  | -0.32889200 |
| C  | -1.14187200 | 1.70650900  | -0.03811500 |
| C  | -4.89310500 | 1.79427100  | -0.53717500 |

---

---

|   |             |             |             |
|---|-------------|-------------|-------------|
| H | -5.72264800 | 2.48666400  | -0.63312000 |
| C | 5.32173000  | -1.25432700 | -0.02486400 |
| H | 5.84235800  | -2.19708000 | 0.09648000  |
| C | -4.00920300 | -0.43320700 | -0.49557200 |
| H | -4.09672700 | -1.51517800 | -0.55271200 |
| C | 3.93467100  | -1.22890500 | -0.04214900 |
| H | 3.34784000  | -2.13457100 | 0.06400000  |
| C | 5.37484500  | 1.14326300  | -0.31499100 |
| H | 5.89956500  | 2.08503000  | -0.42322900 |
| C | 6.04106700  | -0.06790100 | -0.16099300 |
| H | 7.12559500  | -0.08137600 | -0.14726400 |
| N | -0.31612500 | 0.85116100  | -0.53555200 |
| N | -2.77901100 | 0.02656800  | -0.30248400 |
| N | 1.03077900  | 1.05480000  | -0.28621300 |
| H | 1.47373700  | 1.89409400  | -0.63973500 |
| N | -0.81737500 | 2.85515200  | 0.60702000  |
| H | 0.11167300  | 2.85495600  | 1.01399600  |
| H | -1.52509400 | 3.20621800  | 1.23816800  |
| O | 1.18122300  | -1.18669900 | -0.10908300 |
| F | 3.37015200  | 2.33396100  | -0.48078100 |

---

**Table S9B.** Coordinates of optimized geometry of complex **1** determined at B3LYP-D3/6-31G(d,p) level

---

|    |             |             |             |
|----|-------------|-------------|-------------|
| Zn | -0.99681000 | -1.19987700 | 0.16047600  |
| Cl | -1.04308300 | -0.97864000 | 2.40024200  |
| Cl | -1.61214900 | -2.83558900 | -1.20138000 |
| C  | -2.56787300 | 1.40356300  | -0.18004600 |
| C  | 1.79219000  | -0.13557400 | -0.11542800 |
| C  | -3.58960400 | 2.34153700  | -0.31802700 |
| H  | -3.37946400 | 3.40659000  | -0.31594300 |
| C  | -5.12176600 | 0.50027900  | -0.55893200 |
| H  | -6.11937200 | 0.10107600  | -0.70821000 |
| C  | 3.27511600  | -0.01733600 | -0.15287300 |
| C  | 4.00152000  | 1.17378400  | -0.26595100 |
| C  | -1.13588800 | 1.75499000  | 0.01732900  |
| C  | -4.89290400 | 1.87249300  | -0.50434600 |
| H  | -5.71283900 | 2.57554100  | -0.61729400 |
| C  | 5.40361700  | -1.20007600 | -0.09560500 |
| H  | 5.95110400  | -2.13459600 | -0.02702000 |
| C  | -4.03203300 | -0.36623600 | -0.42547700 |
| H  | -4.12844100 | -1.44677900 | -0.48032500 |

---

|   |             |             |             |
|---|-------------|-------------|-------------|
| C | 4.01343300  | -1.21062400 | -0.06759700 |
| H | 3.45786900  | -2.13770100 | 0.02175000  |
| C | 5.38649500  | 1.21205400  | -0.29671200 |
| H | 5.88460300  | 2.17111600  | -0.38759200 |
| C | 6.09151400  | 0.01152400  | -0.20959700 |
| H | 7.17711000  | 0.02659400  | -0.23158800 |
| N | -0.30912600 | 0.81429300  | -0.30437400 |
| N | -2.79347500 | 0.08025800  | -0.23034000 |
| N | 1.04091300  | 1.01952200  | -0.12182600 |
| H | 1.46203800  | 1.88166300  | -0.44961700 |
| N | -0.78207100 | 2.99818200  | 0.47530300  |
| H | 0.11585500  | 3.03462000  | 0.94852500  |
| H | -1.50019000 | 3.49258100  | 0.99024400  |
| O | 1.23636500  | -1.23423200 | -0.05225100 |
| F | 3.34527400  | 2.36814400  | -0.35684500 |

**Table S10A.** Coordinates of optimized geometry of complex **2** determined at M06-2X/6-31G(d,p) level

|    |             |             |             |
|----|-------------|-------------|-------------|
| Zn | -0.96210400 | -1.03466100 | -0.07957400 |
| N  | -2.93335900 | -0.00150100 | 0.00315200  |
| N  | 0.71436500  | 1.42977400  | -0.29749000 |
| H  | 0.99907100  | 1.95522400  | 0.52874100  |
| N  | -1.33841300 | 3.19946200  | 0.40679600  |
| H  | -0.42430900 | 3.61644100  | 0.33835000  |
| H  | -1.97205900 | 3.60712800  | 1.07542900  |
| N  | -0.61428500 | 1.09074800  | -0.37150600 |
| C  | 1.54223800  | 0.33642600  | -0.57190600 |
| C  | -2.89690100 | 1.33557100  | 0.03936200  |
| C  | -1.51957600 | 1.90635700  | 0.02668000  |
| C  | 2.99278200  | 0.61263900  | -0.40513900 |
| C  | -4.04493400 | 2.11681400  | 0.05791200  |
| H  | -3.98219900 | 3.19908200  | 0.03813800  |
| C  | -5.31423200 | 0.08001600  | 0.01383100  |
| H  | -6.25406500 | -0.45862400 | 0.00203100  |
| C  | 4.84354300  | 2.16088600  | -0.66398200 |
| H  | 5.21737000  | 3.13003400  | -0.97440900 |
| C  | 5.23167500  | -0.04861900 | 0.22863500  |
| H  | 5.89853700  | -0.80150700 | 0.63261100  |
| C  | 3.49245900  | 1.86539300  | -0.78095900 |
| H  | 2.80642000  | 2.59435400  | -1.20009500 |
| C  | -5.27802400 | 1.46667700  | 0.05513100  |
| H  | -6.19696800 | 2.04300400  | 0.06922200  |

|    |             |             |             |
|----|-------------|-------------|-------------|
| C  | -4.10871400 | -0.62139500 | -0.02612400 |
| H  | -4.06203800 | -1.70480200 | -0.09549200 |
| C  | 5.71109300  | 1.19843700  | -0.15513300 |
| H  | 6.76964600  | 1.41471500  | -0.05651500 |
| C  | 3.87795500  | -0.35035400 | 0.10111300  |
| Cl | 3.33622200  | -1.90490800 | 0.62583600  |
| O  | 1.07501000  | -0.71624000 | -0.96517900 |
| Cl | -1.72024800 | -2.74869400 | -1.28062000 |
| Cl | -0.23425100 | -0.88803200 | 2.06934100  |

**Table S10B.** Coordinates of optimized geometry of complex **2** determined at B3LYP-D3/6-31G(d,p) level

|    |             |             |             |
|----|-------------|-------------|-------------|
| Zn | 1.01628800  | -1.04011900 | 0.06393600  |
| N  | 2.95538400  | 0.00836800  | -0.04645300 |
| N  | -0.72130400 | 1.40131400  | 0.25298500  |
| H  | -1.01048700 | 1.92163900  | -0.57439700 |
| N  | 1.31978500  | 3.21522800  | -0.35511000 |
| H  | 0.40114000  | 3.61743300  | -0.26199200 |
| H  | 1.95342000  | 3.67847000  | -0.98631900 |
| N  | 0.61109900  | 1.05540900  | 0.31290600  |
| C  | -1.56957800 | 0.32751800  | 0.57274300  |
| C  | 2.90176100  | 1.35173700  | -0.05425900 |
| C  | 1.52070300  | 1.90413200  | -0.03497700 |
| C  | -3.01649500 | 0.62170100  | 0.39105800  |
| C  | 4.05093600  | 2.14200600  | -0.05121700 |
| H  | 3.98387900  | 3.22328700  | -0.00486900 |
| C  | 5.34238900  | 0.11163100  | -0.05127100 |
| H  | 6.28805300  | -0.41853900 | -0.05119200 |
| C  | -4.84620600 | 2.22093600  | 0.59079200  |
| H  | -5.19925000 | 3.20941100  | 0.86573200  |
| C  | -5.27981800 | -0.01538100 | -0.22216300 |
| H  | -5.96417900 | -0.76674800 | -0.59926300 |
| C  | -3.49906000 | 1.90032900  | 0.72072600  |
| H  | -2.80176700 | 2.63241700  | 1.11511000  |
| C  | 5.29238300  | 1.50308200  | -0.06119100 |
| H  | 6.20583800  | 2.08934600  | -0.05996200 |
| C  | 4.14100100  | -0.60099900 | -0.02716400 |
| H  | 4.10071300  | -1.68466900 | 0.02448900  |
| C  | -5.73612500 | 1.25716900  | 0.11520800  |
| H  | -6.79075600 | 1.49098200  | 0.00712600  |
| C  | -3.92896800 | -0.34231000 | -0.08213600 |
| Cl | -3.42710300 | -1.94130000 | -0.55783200 |
| O  | -1.11357400 | -0.71814500 | 1.00893600  |

---

|    |            |             |             |
|----|------------|-------------|-------------|
| Cl | 1.75264100 | -2.67853900 | 1.35355700  |
| Cl | 0.25452400 | -1.03285800 | -2.05756200 |

---

**Table S11A.** Coordinates of optimized geometry of complex **3** determined at M06-2X/6-31G(d,p) level

---

|    |             |             |             |
|----|-------------|-------------|-------------|
| Zn | -1.08599300 | -0.90936900 | 0.14462100  |
| Br | 3.01404700  | -1.67578200 | -0.42467200 |
| Cl | -0.27685600 | -0.59525300 | -1.96595300 |
| Cl | -1.66840400 | -2.76474800 | 1.22464400  |
| O  | 0.80537800  | -0.35634900 | 1.19271400  |
| N  | -3.15222700 | -0.10286300 | -0.00132600 |
| N  | -0.99243000 | 1.25360800  | 0.44951300  |
| N  | 0.30383500  | 1.70965800  | 0.38215100  |
| H  | 0.55737300  | 2.18200200  | -0.48644600 |
| N  | -1.89631400 | 3.23147800  | -0.47616800 |
| H  | -1.02685600 | 3.73644600  | -0.41309600 |
| H  | -2.53616200 | 3.52640300  | -1.19664700 |
| C  | -4.25305200 | -0.84809400 | 0.00518800  |
| H  | -4.08892200 | -1.91855700 | 0.09592700  |
| C  | -5.52621400 | -0.28455600 | -0.08637000 |
| H  | -6.40107300 | -0.92346700 | -0.09093500 |
| C  | -5.64131200 | 1.09651300  | -0.15972600 |
| H  | -6.61710600 | 1.56717100  | -0.21569600 |
| C  | -4.48746600 | 1.87864800  | -0.14146600 |
| H  | -4.54215700 | 2.96157300  | -0.14852800 |
| C  | -3.26214300 | 1.22985100  | -0.06718100 |
| C  | -1.95641000 | 1.94880700  | -0.02910500 |
| C  | 1.20374900  | 0.69498900  | 0.72325200  |
| C  | 2.63169900  | 1.02778300  | 0.49771200  |
| C  | 3.53921000  | 0.07288800  | 0.01767300  |
| C  | 4.87066500  | 0.42763800  | -0.18385700 |
| H  | 5.55878500  | -0.31646600 | -0.56724200 |
| C  | 5.30399800  | 1.71762100  | 0.10134000  |
| H  | 6.34662200  | 1.97444900  | -0.05413800 |
| C  | 4.41190500  | 2.67179400  | 0.58318600  |
| H  | 4.75114100  | 3.67504200  | 0.81522400  |
| C  | 3.08154500  | 2.32420200  | 0.77264300  |
| H  | 2.37579300  | 3.04798400  | 1.16807200  |

---

**Table S11B.** Coordinates of optimized geometry of complex **3** determined at B3LYP-D3/6-31G(d,p) level

---

|    |             |             |             |
|----|-------------|-------------|-------------|
| Zn | -1.13554700 | -0.91881000 | 0.13246700  |
| Br | 3.09639800  | -1.68668400 | -0.40739000 |
| Cl | -0.33197900 | -0.76876600 | -1.97611300 |
| Cl | -1.70160000 | -2.68621800 | 1.33367900  |
| O  | 0.83401500  | -0.34625900 | 1.20986900  |
| N  | -3.17918700 | -0.09673500 | -0.02848800 |
| N  | -0.98852100 | 1.22357800  | 0.37170800  |
| N  | 0.30918700  | 1.68869100  | 0.32029300  |
| H  | 0.57197100  | 2.16960500  | -0.53968200 |
| N  | -1.90221900 | 3.25669600  | -0.43993500 |
| H  | -1.02736100 | 3.75132600  | -0.36845100 |
| H  | -2.55387900 | 3.60017000  | -1.12761700 |
| C  | -4.28914200 | -0.83541400 | -0.01882200 |
| H  | -4.12778100 | -1.90541600 | 0.07075100  |
| C  | -5.56167000 | -0.26438800 | -0.10157200 |
| H  | -6.44141000 | -0.89797200 | -0.10713800 |
| C  | -5.66793000 | 1.12249000  | -0.16409500 |
| H  | -6.64100500 | 1.60110200  | -0.21100300 |
| C  | -4.50683000 | 1.89792300  | -0.14530300 |
| H  | -4.56151100 | 2.98091400  | -0.14065800 |
| C  | -3.27698900 | 1.24359800  | -0.08515400 |
| C  | -1.96749600 | 1.94993600  | -0.05191800 |
| C  | 1.22570600  | 0.69703300  | 0.70551700  |
| C  | 2.65085200  | 1.04593200  | 0.47974600  |
| C  | 3.58549900  | 0.09643100  | 0.02306600  |
| C  | 4.91636400  | 0.47097100  | -0.17214600 |
| H  | 5.62271300  | -0.26583200 | -0.53648000 |
| C  | 5.32836800  | 1.77565100  | 0.09434200  |
| H  | 6.36909500  | 2.04626500  | -0.05556100 |
| C  | 4.41333600  | 2.72517000  | 0.55109600  |
| H  | 4.73328300  | 3.73891200  | 0.76873500  |
| C  | 3.08427900  | 2.35781100  | 0.73485100  |
| H  | 2.36617300  | 3.07948800  | 1.11147500  |

---



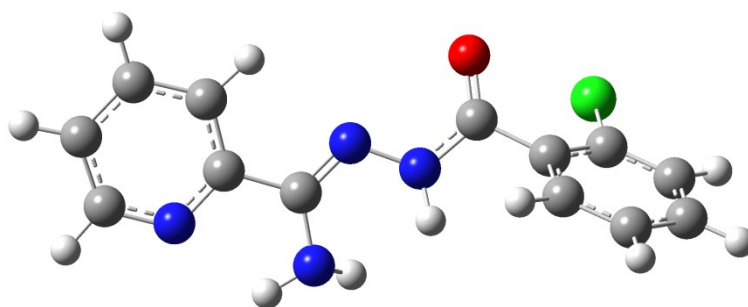

**Figure S1.** Optimized geometry of 'closed' molecule in asymmetric unit of ligand **hyd-Cl** calculated at dispersion corrected B3LYP/6-31G(d,p) level of theory

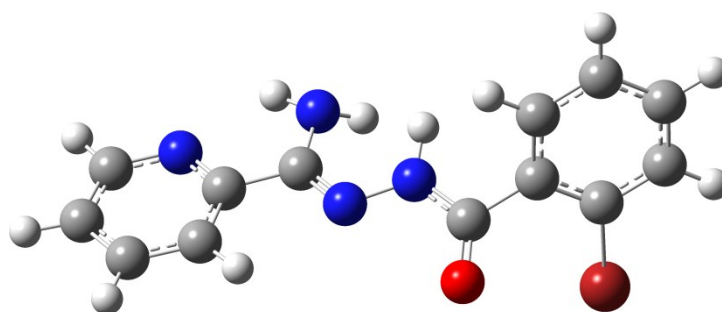

**Figure S2.** Optimized geometry of 'closed' molecule in asymmetric unit of ligand **hyd-Br** calculated at dispersion corrected B3LYP/6-31G(d,p) level of theory

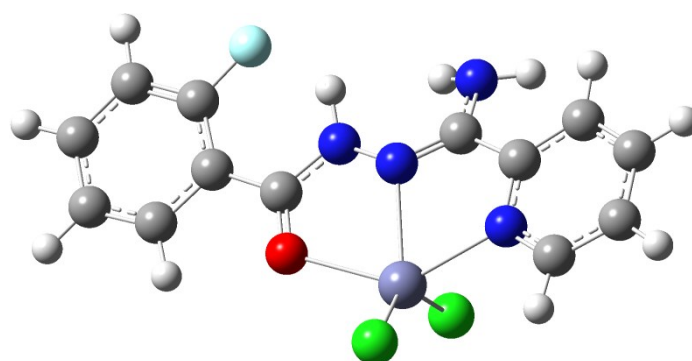

**Figure S3.** Optimized geometry of 'closed' molecule in asymmetric unit of complex **1** calculated at dispersion corrected B3LYP/6-31G(d,p) level of theory

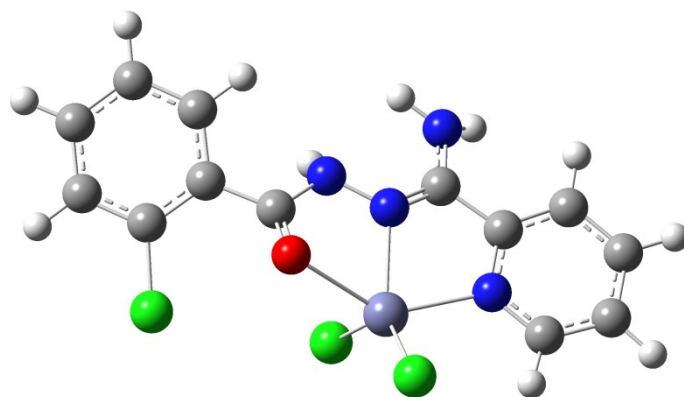

**Figure S4.** Optimized geometry of 'closed' molecule in asymmetric unit of complex **2** calculated at dispersion corrected B3LYP/6-31G(d,p) level of theory

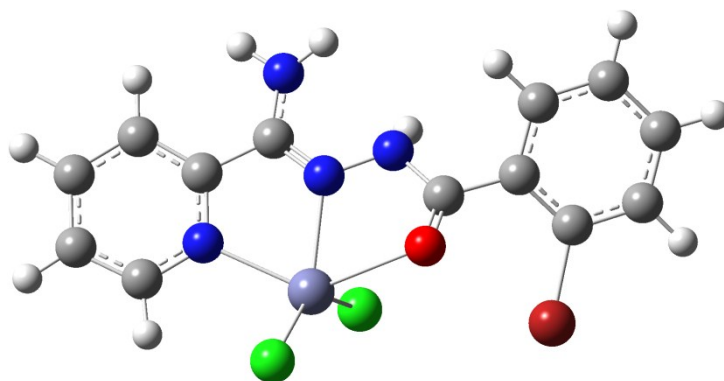

**Figure S5.** Optimized geometry of 'closed' molecule in asymmetric unit of complex **3** calculated at dispersion corrected B3LYP/6-31G(d,p) level of theory

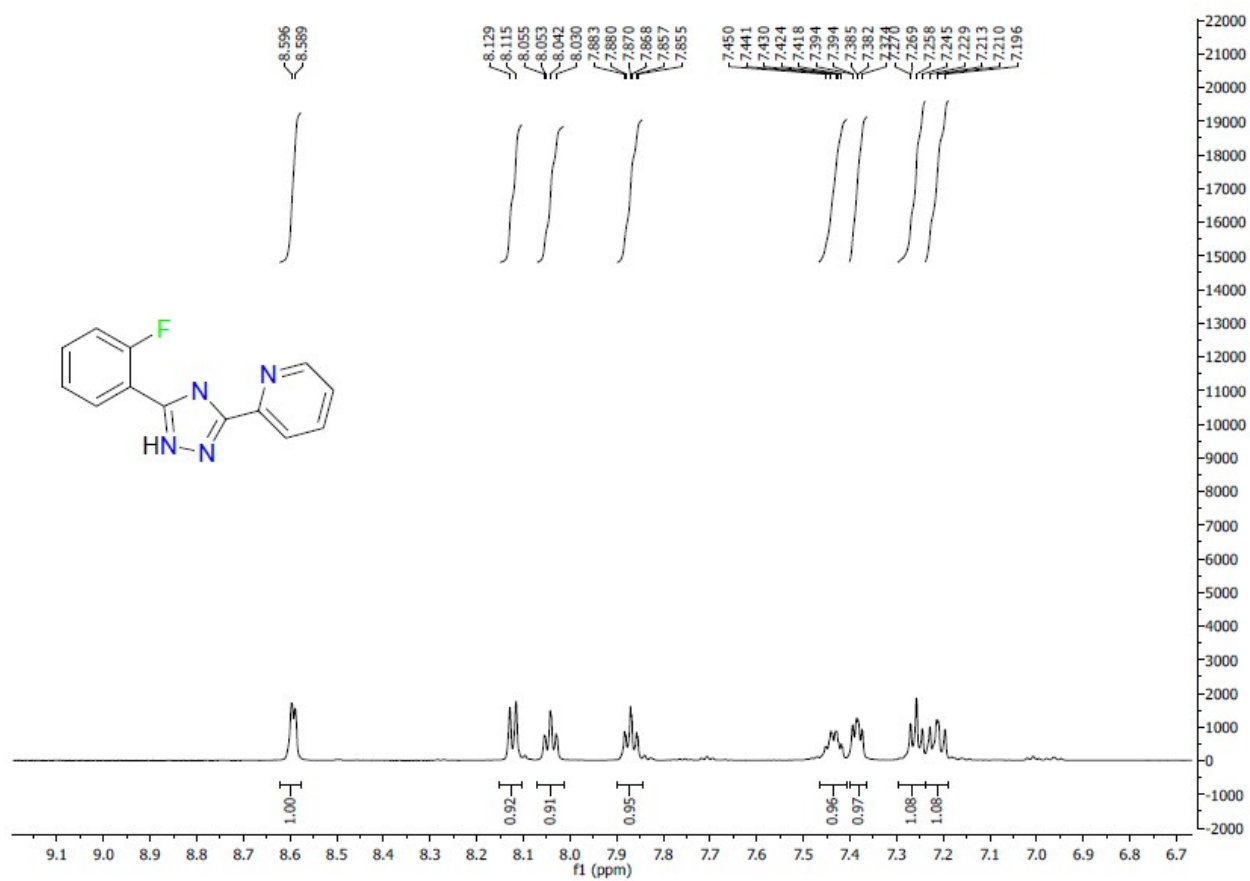

**Figure S6.**  $^1\text{H}$  NMR spectrum of ligand **trz-F** (600 MHz,  $\text{DMSO-}d_6$ )

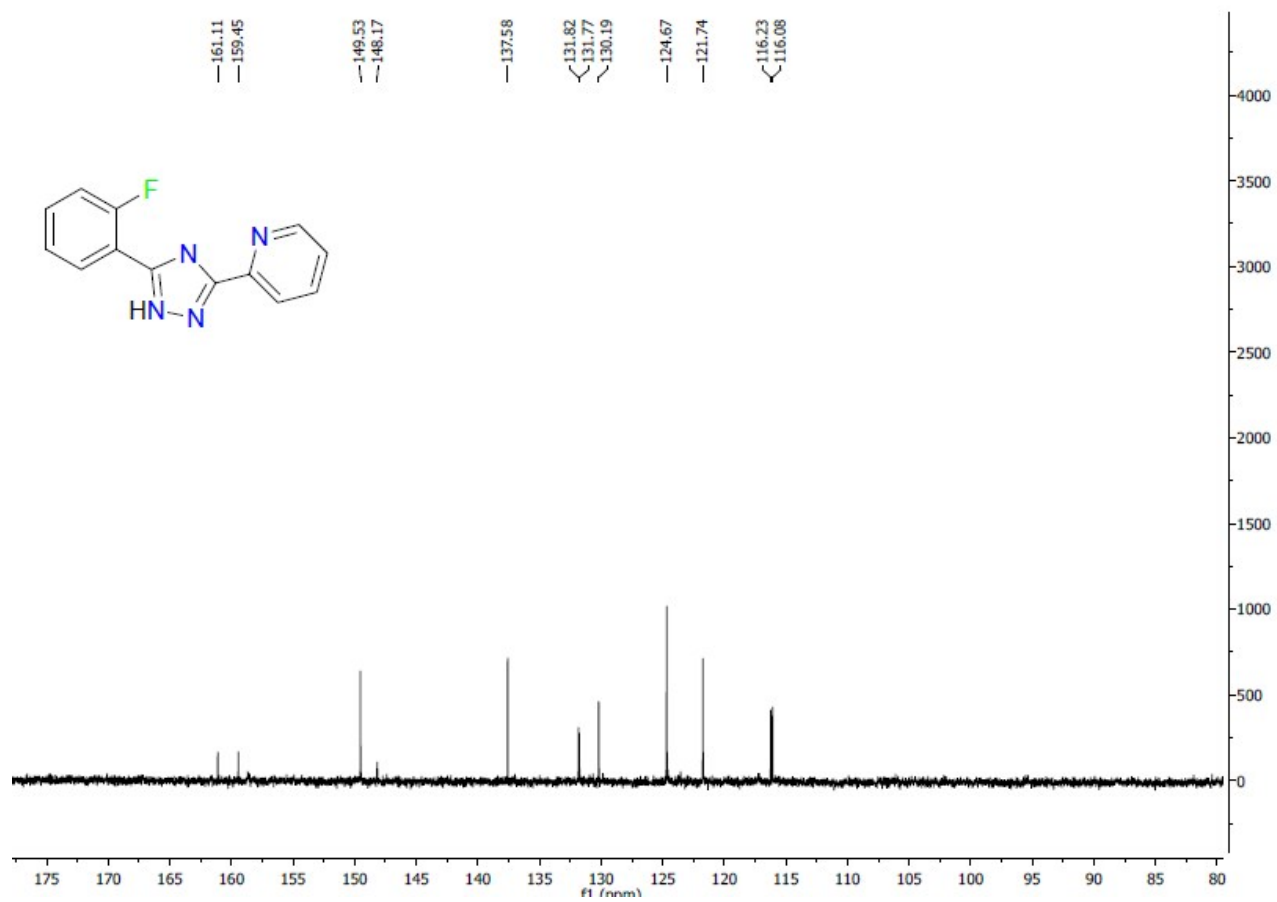

**Figure S7.**  $^{13}\text{C}$  NMR spectrum of ligand **trz-F** (150 MHz,  $\text{DMSO-}d_6$ )

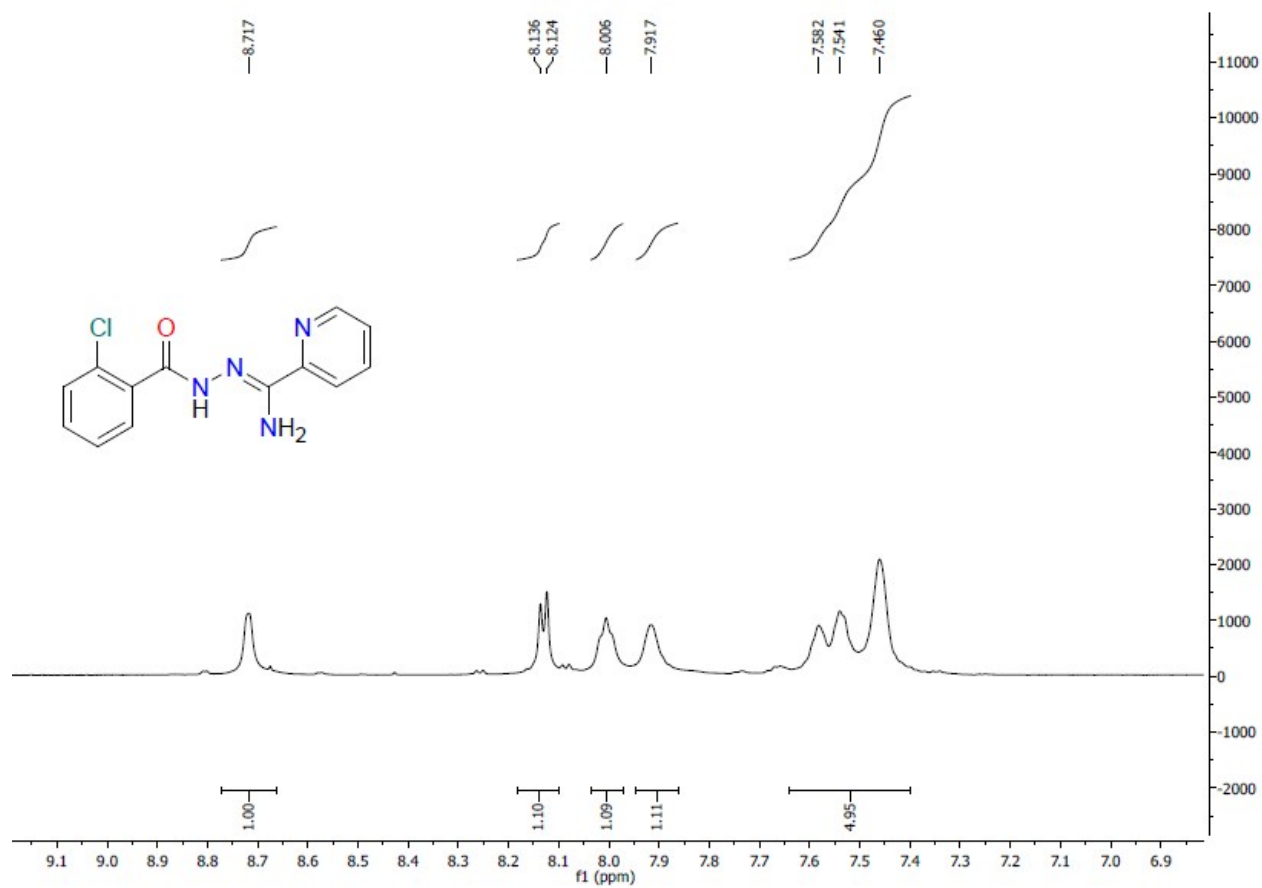

**Figure S8.**  $^1\text{H}$  NMR spectrum of ligand **hyd-Cl** (600 MHz,  $\text{DMSO-}d_6$ )

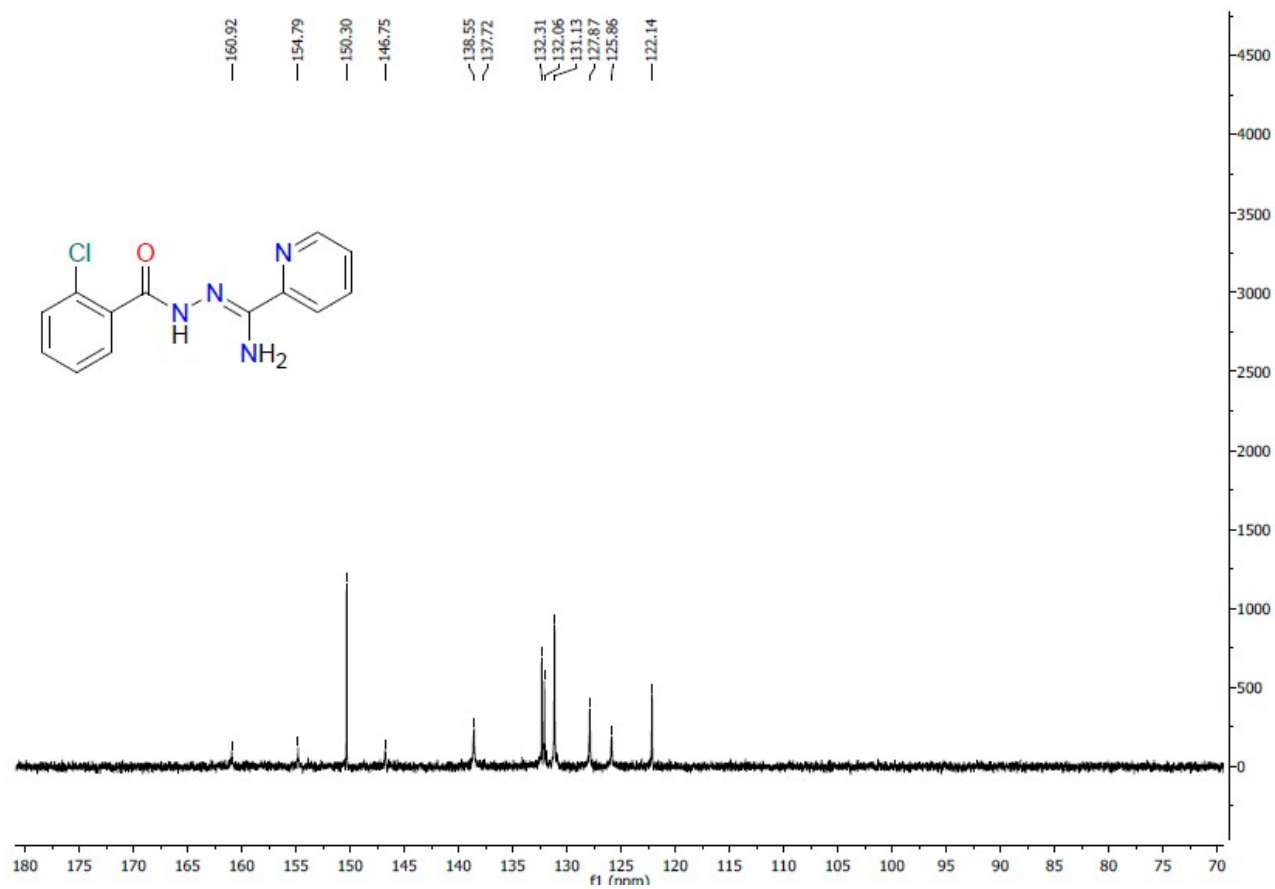

**Figure S9.**  $^{13}\text{C}$  NMR spectrum of ligand **hyd-Cl** (150 MHz, DMSO  $d_6$ )

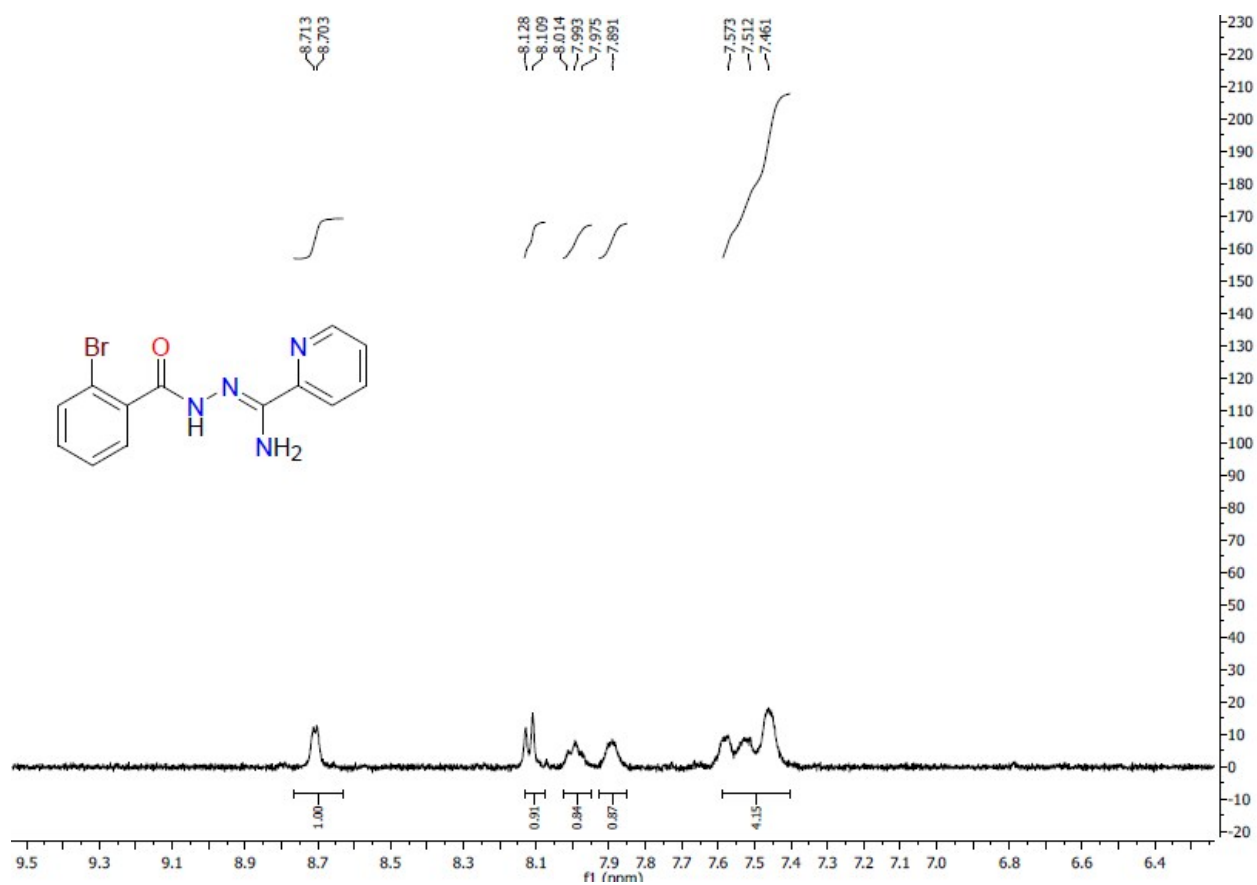

**Figure S10.**  $^1\text{H}$  NMR spectrum of ligand **hyd-Br** (400 MHz,  $\text{DMSO-}d_6$ )

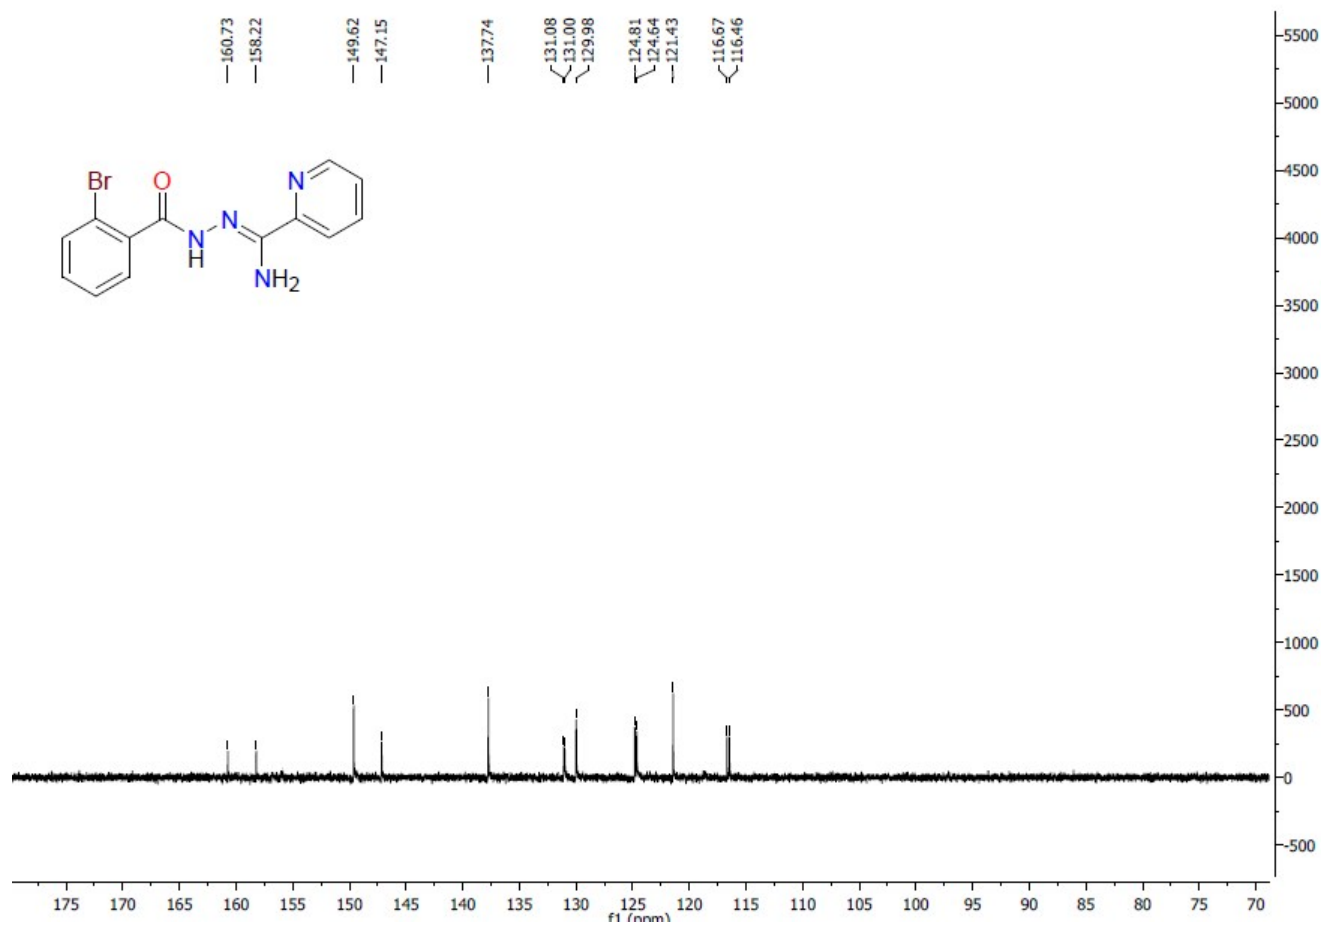

**Figure S11.**  $^{13}\text{C}$  NMR spectrum of ligand **hyd-Br** (150 MHz,  $\text{DMSO } d_6$ )



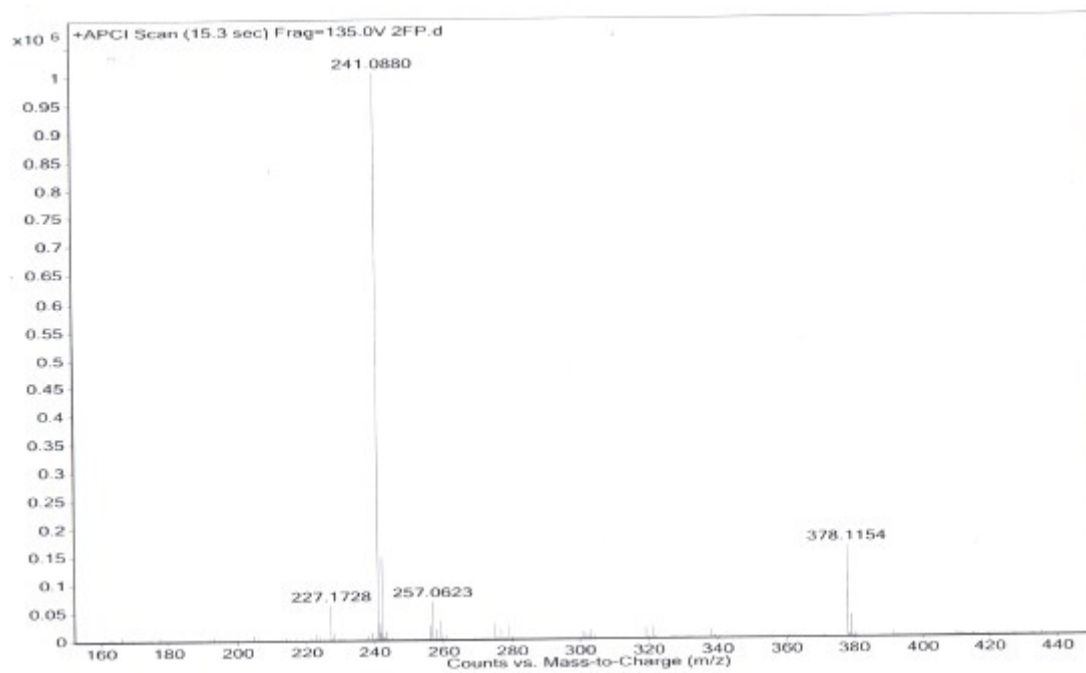

Figure S12. ESI MS of ligand **trz-F**

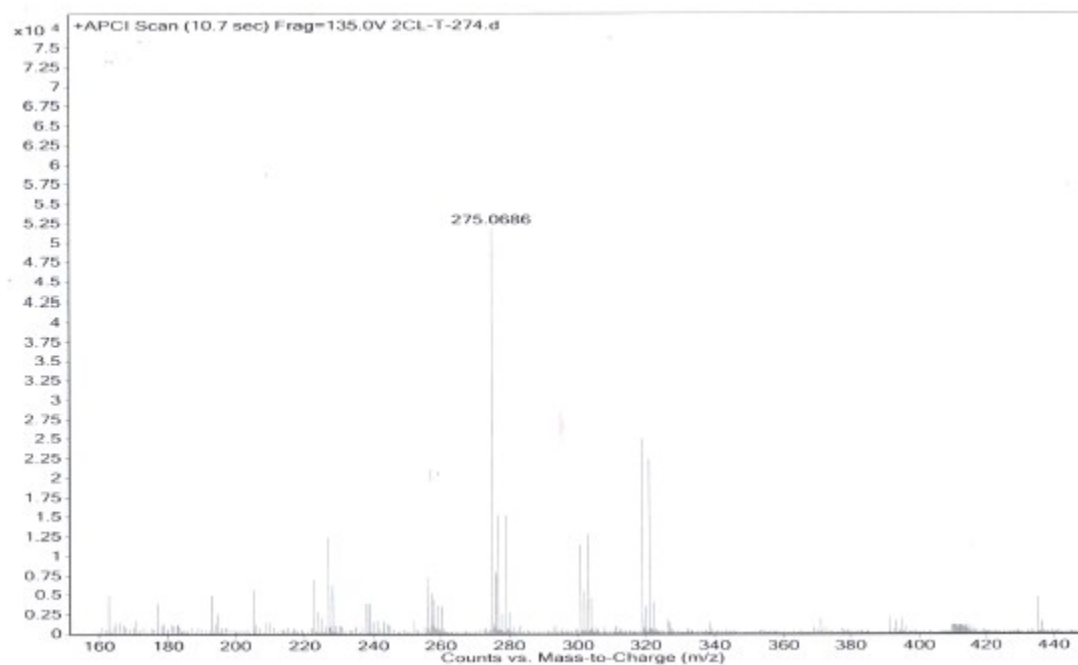

Figure S13. ESI MS of ligand **hyd-Cl**

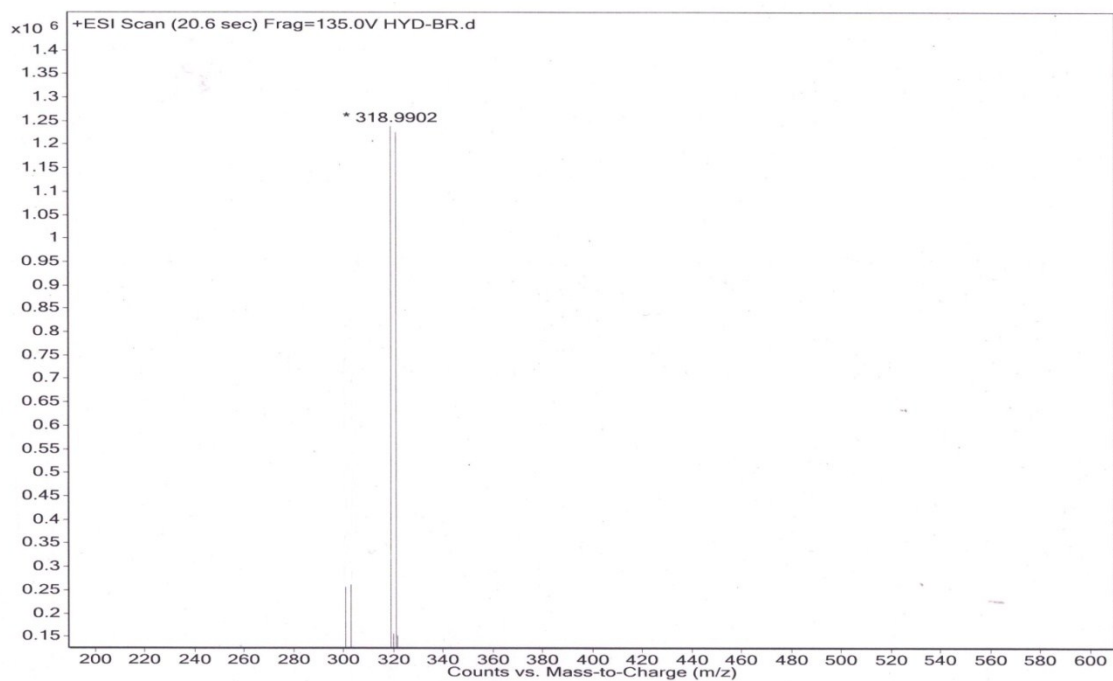

**Figure S14.** ESI MS of ligand **hyd-Br**

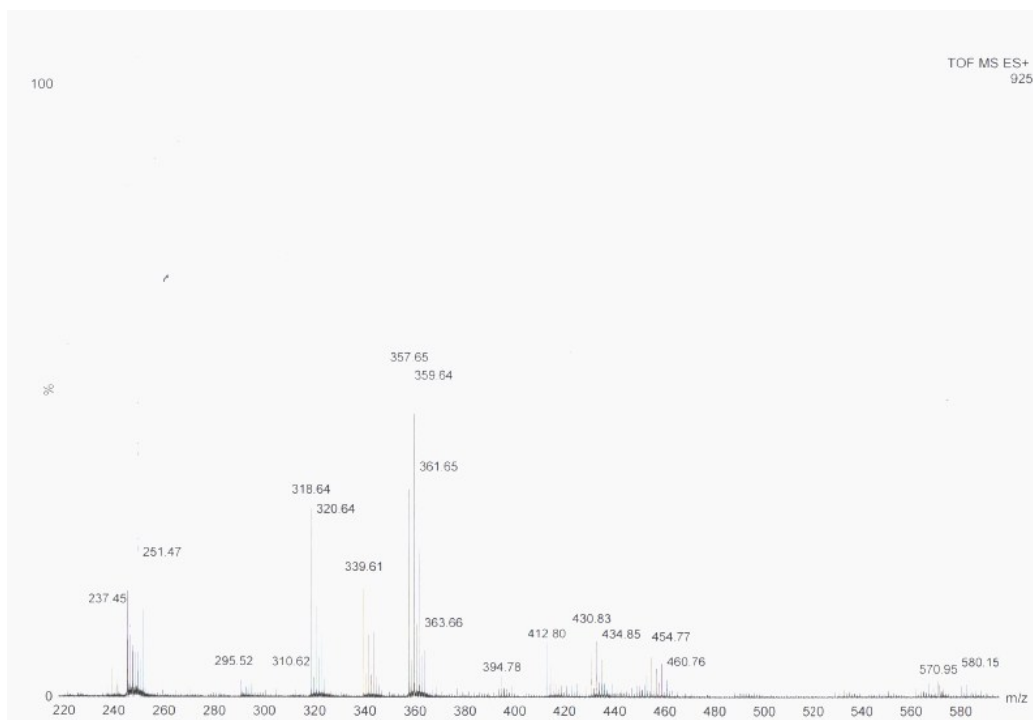

**Figure S15.** ESI MS of complex **1**

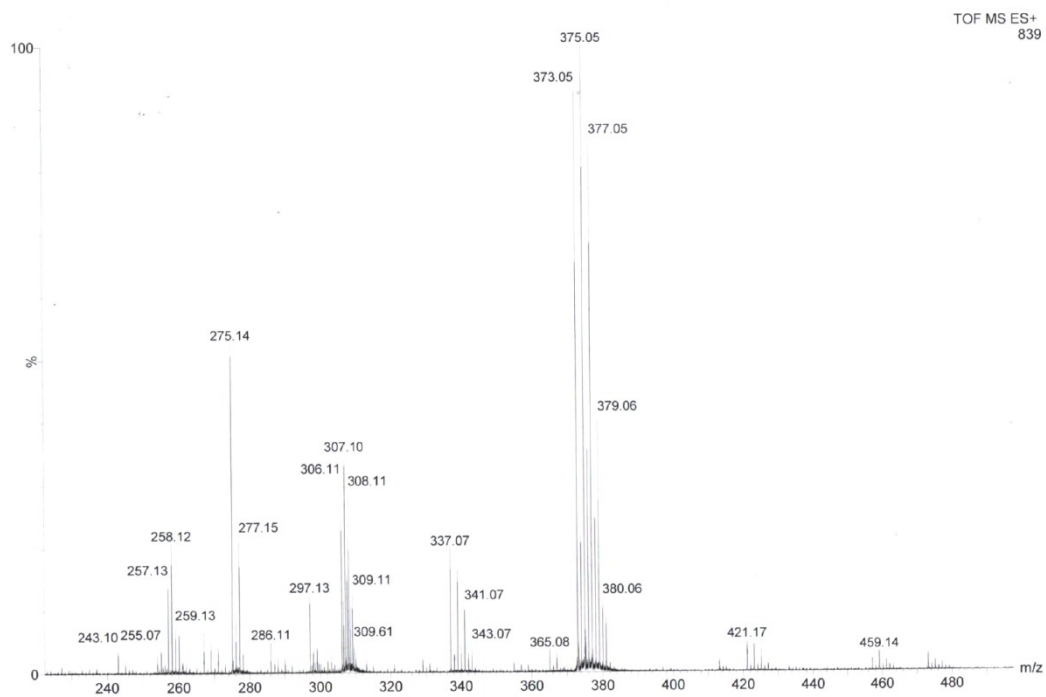

**Figure S16.** ESI MS of complex 2

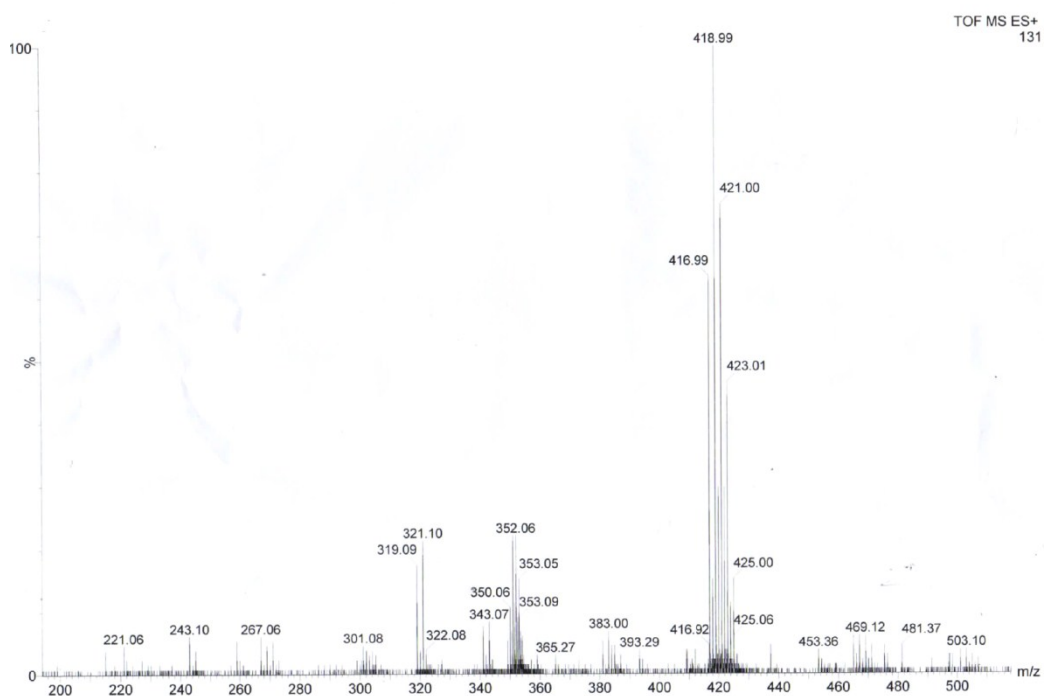

**Figure S17.** ESI MS of complex 3
